# Supplementary material for: Ecologically friendly conversion coatings with special wetting behaviors for wax prevention
Source: Royal Society of Chemistry journal article supplement (doi:10.1039/c6ra00611f), 2016-01-01
Supplement: c6ra00611f1.pdf [file c6ra00611f1.pdf]

# Ecologically Green Conversion Coatings with Special Wetting Behaviors for Wax Prevention

*Weitao Liang, Liqun Zhu, Weiping Li, Chang Xu, Huicong Liu\**

(Key Laboratory of Aerospace Materials and Performance (Ministry of Education), School of  
Materials Science and Engineering, Beihang University, Beijing 100191, China)

\*E-mail address: [liuhc@buaa.edu.cn](mailto:liuhc@buaa.edu.cn).

Tel: +86 1082317113. Fax: +86 1082317113.

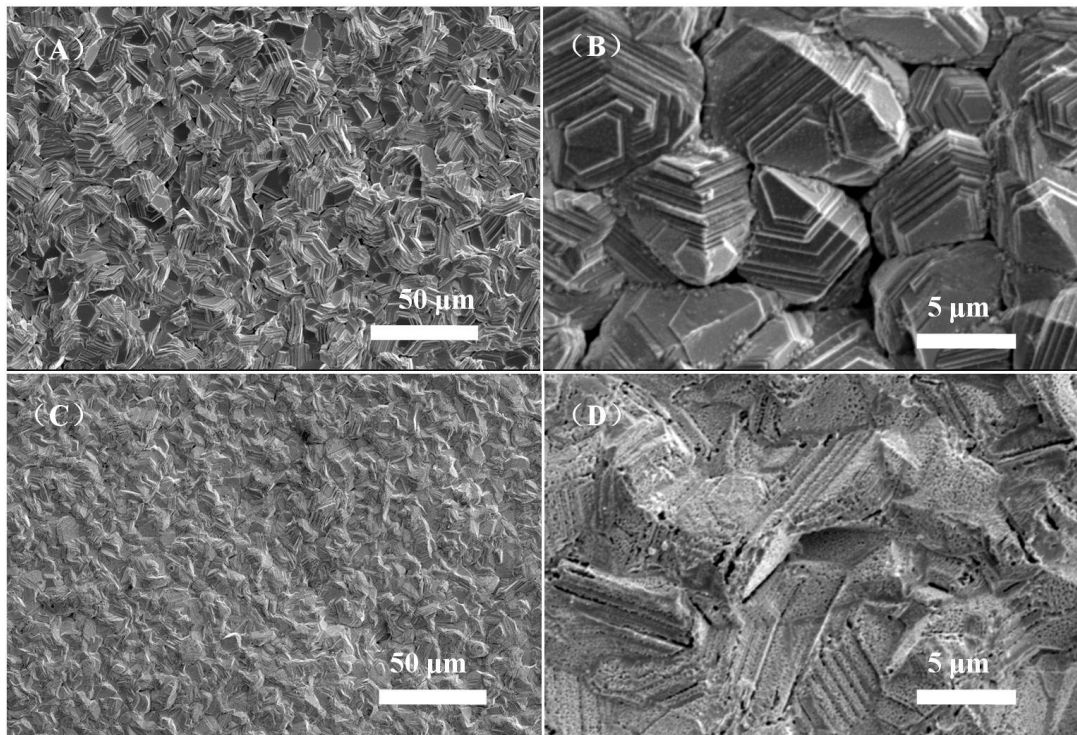

**Figure S1.** SEM images of the specimen surface attained with different conversion solution pH value:  
(A) SEM image and (B) high-resolution SEM image with the pH value of 1.0; (C) SEM image and (D)  
high-resolution SEM image with the pH value of 6.0.

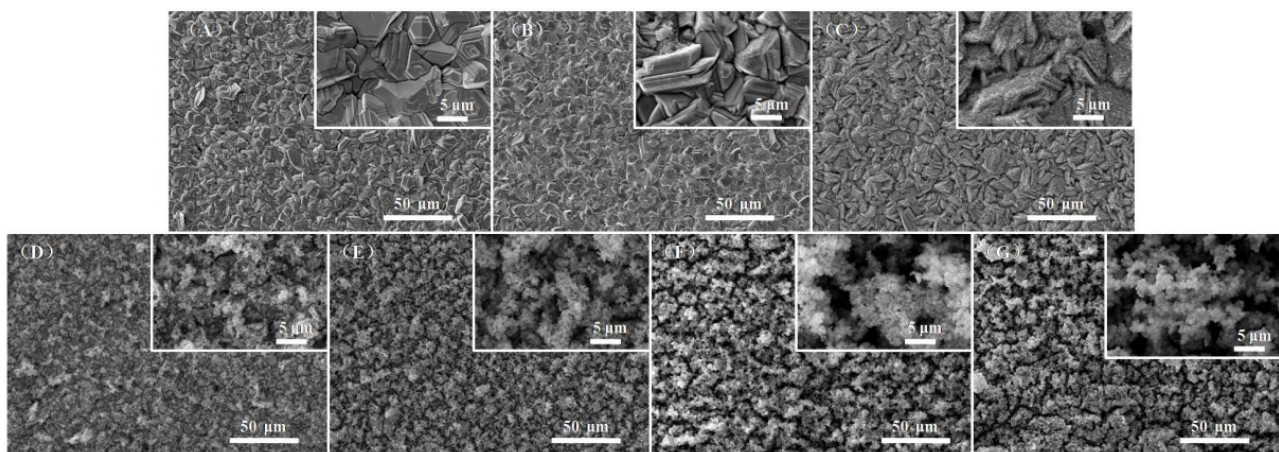

**Figure S2.** Detailed SEM images of the phytic acid conversion coatings with different conversion time of: (A) 0 min; (B) 1 min; (C) 5 min; (D) 10 min; (E) 20 min; (F) 30 min; (G) 60 min. Insets are high-resolution SEM images of the corresponding images.

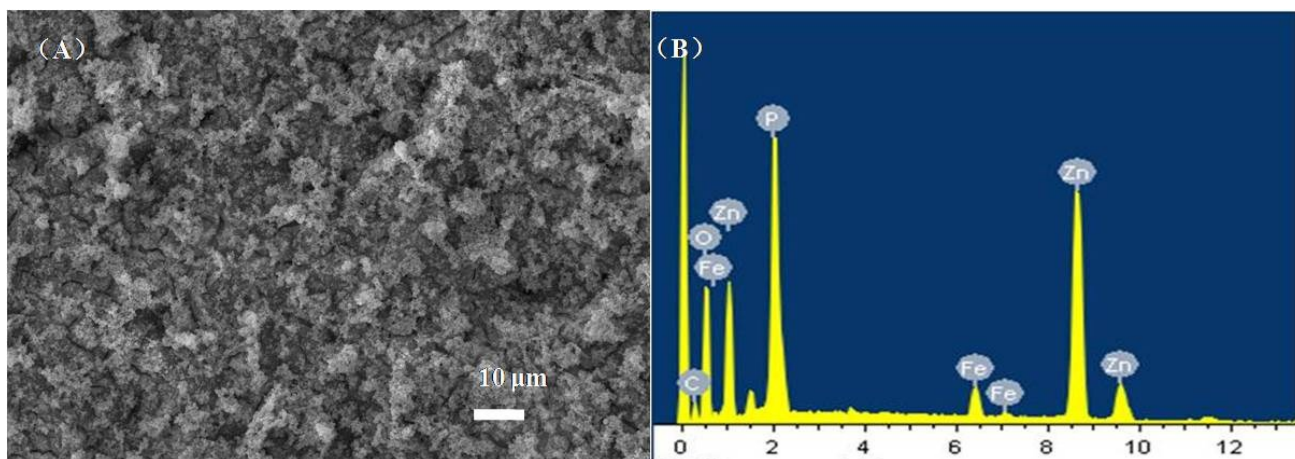

**Figure S3.** SEM image and corresponding EDS pattern of the new particles in section 3.3.

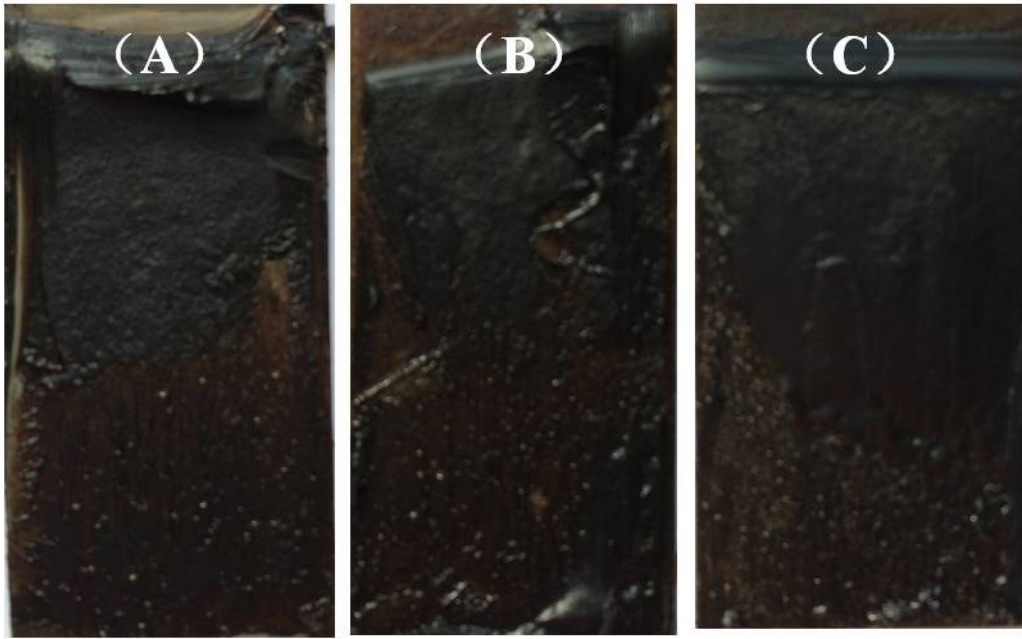

**Figure S4.** Digital images of the pure A3 carbon steels after wax deposition test. (A), (B) and (C) are three identical parallel samples.

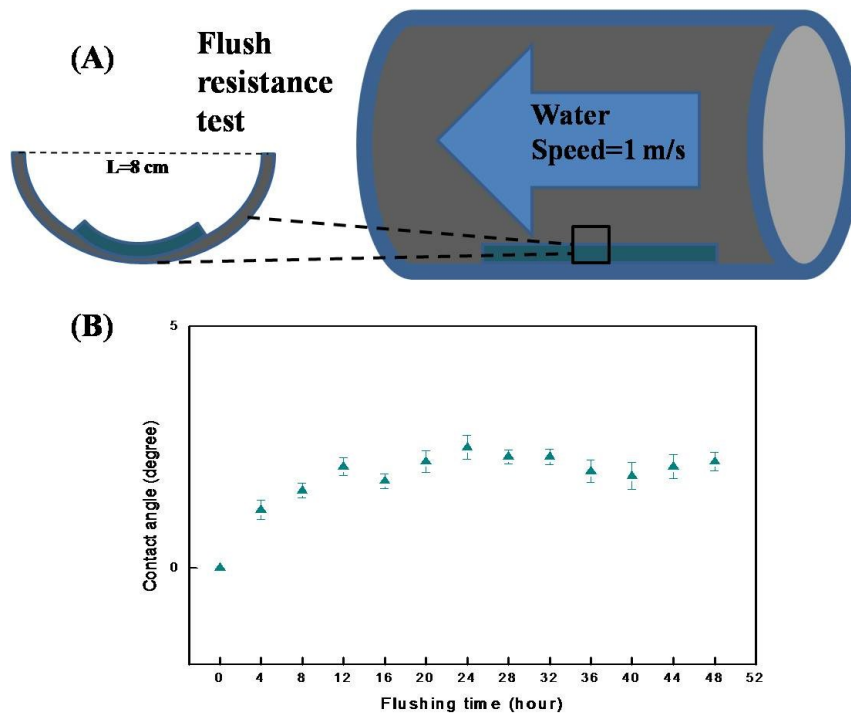

**Figure S5.** (A) Schematic diagram of the pipe-like model for the flush resistance test; (B) Results of the flushing test.
